# Supplementary material
Source: publisher figshare collection journal article supplement (https://karger.figshare.com/ndownloader/files/8708995)
Supplement: Supplementary file 1 [file 8708995]

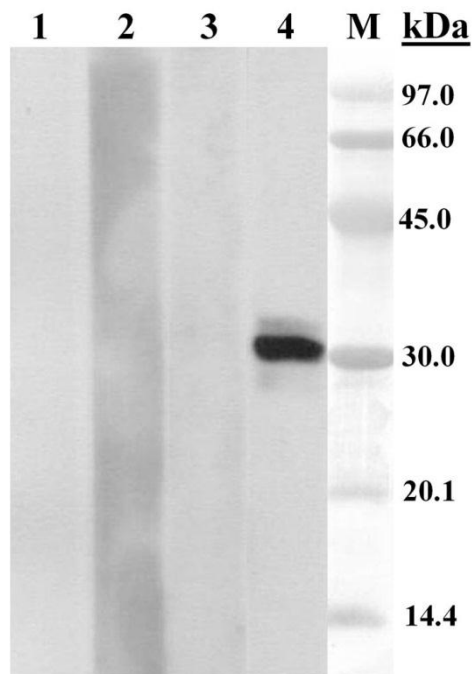

**Online Supplementary Fig. 1.** IgE- Immunoblotting results (in non-reducing conditions). Purified PSA in solid phase. Lane 1: control serum (pool of sera from non atopic subjects); lanes 2, 3, 4: patient's serum previously incubated with dog dander extract (1mg/ml), or purified rCan f 5 (100  $\mu$ l/ml), or BSA (100  $\mu$ l/ml), respectively. Lane M: Molecular weight standard.
